# Supplementary material for: Paracrine cross-talk between skeletal muscle and macrophages in exercise by PGC-1α-controlled BNP
Source: PubMed Central journal article supplement (PMC5238507; doi:10.1038/srep40789), 2017-01-16
Supplement: srep40789-s1.pdf [file srep40789-s1.pdf]

**Paracrine cross-talk between skeletal muscle and macrophages in exercise by PGC-1 $\alpha$ -  
controlled BNP**

**Regula Furrer<sup>1,%</sup>, Petra S. Eisele<sup>1,%,&</sup>, Alexander Schmidt<sup>2</sup>, Markus Beer<sup>1,#</sup>, and Christoph Handschin<sup>1,\*</sup>**

<sup>1</sup>Biozentrum, Division of Pharmacology/Neurobiology, University of Basel,  
CH-4056 Basel, Switzerland

<sup>2</sup>Biozentrum, Proteomics Core Facility, University of Basel,  
CH-4056 Basel, Switzerland

<sup>%</sup>shared first authorship

<sup>&</sup>Present address: Labor Team W, Goldach, Switzerland

<sup>#</sup>This manuscript is dedicated to the memory of our coworker and friend Markus Beer (deceased on Aug 24, 2015).

<sup>\*</sup>Materials & Correspondence: Christoph Handschin, Biozentrum, University of Basel, Klingelbergstrasse 50/70, CH-4056 Basel, Switzerland, Phone: +41 61 267 2378, Fax +41 61 267 2208, Email: christoph.handschin@unibas.ch

## Supplemental Information

### Supplemental Figures

**Supplemental Figure S1** related to Figure 2. *Treatment of RAW macrophages with myokines induced by PGC-1 $\alpha$  only mildly increased the expression of pro- and anti-inflammatory cytokines.* **A.** mRNA expression levels of myokines were measured in C2C12 myotubes adenovirally overexpressing PGC-1 $\alpha$  or GFP **B, C.** RAW macrophages were treated for 4h with myokines known to be induced by PGC-1 $\alpha$ . Relative expression of pro- (**B**) and anti-inflammatory (**C**) cytokines was determined by RT-PCR. Values represent the mean of at least 3 independent experiments +SEM. \*  $P<0.05$ ; \*\*  $P<0.01$ ; \*\*\*  $P<0.001$ ; myokine versus control.

**Supplemental Figure S2** related to Figure 4. *Treatment of RAW macrophages with different BNP concentrations increased the expression of pro- and anti-inflammatory cytokines in a dose-dependent manner.* After treating RAW macrophages with PBS, 1, 2, and 4 nM BNP for 4 h, mRNA expression levels of pro- and anti-inflammatory cytokines were determined by RT-PCR. Values represent the mean of at least 3 independent experiments +SEM. \*  $P<0.05$ ; \*\*  $P<0.01$ ; \*\*\*  $P<0.001$ ; BNP treated versus control.

**A** expression in C2C12 myotubes

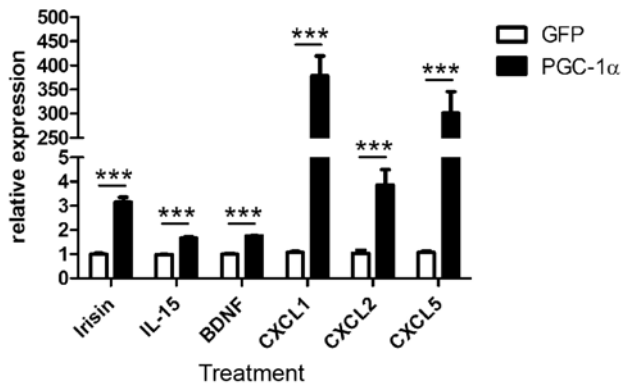

**B** TNFα expression

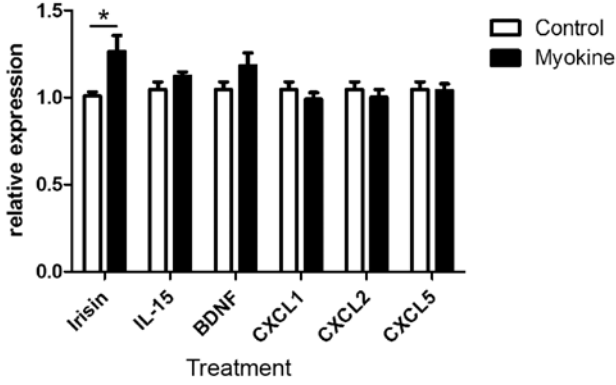

**C** CCL22 expression

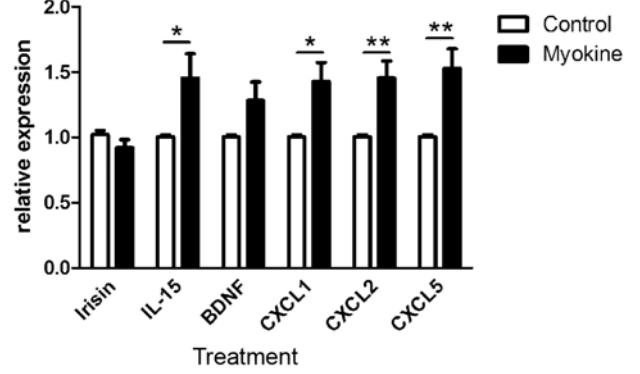

IL-6 expression

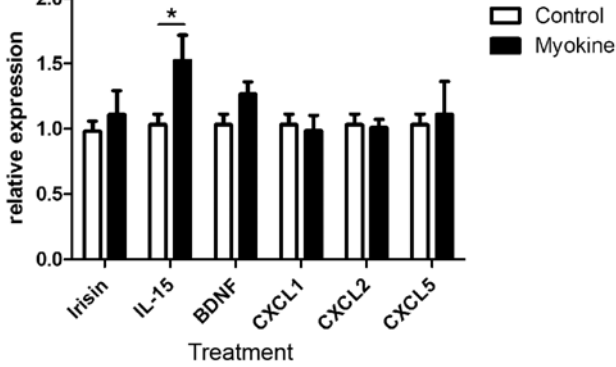

IL-1Ra expression

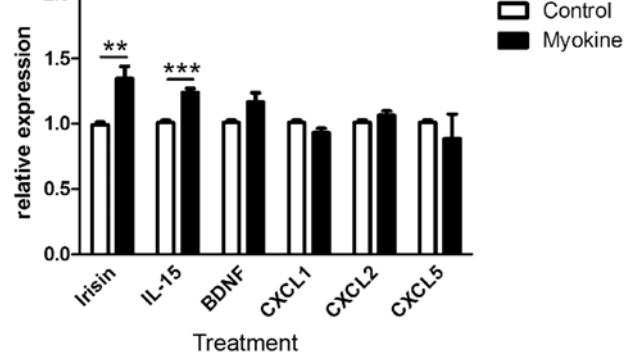

MIP-1α expression

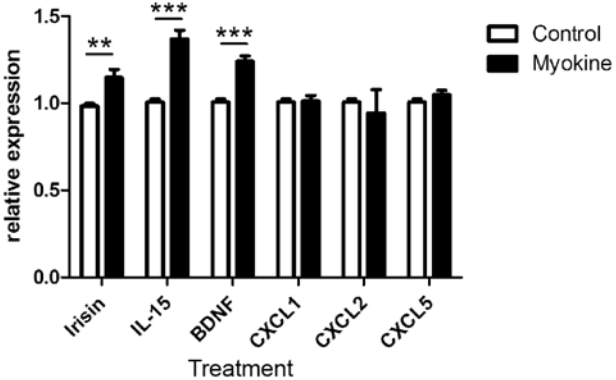

TGFβ expression

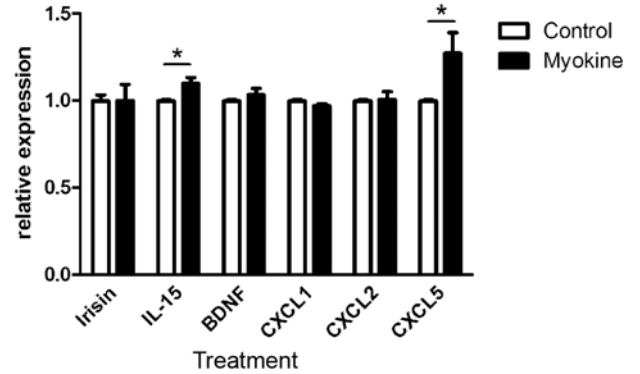

MCP-1 expression

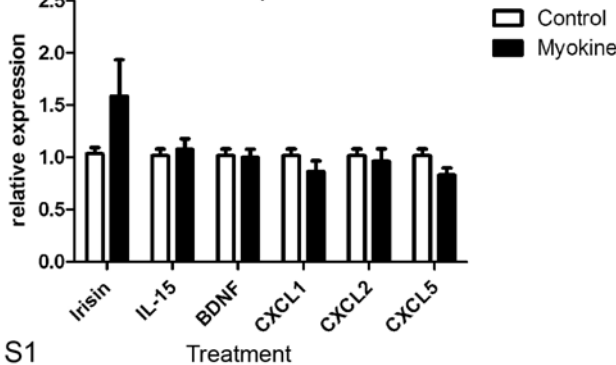

Il-10 expression

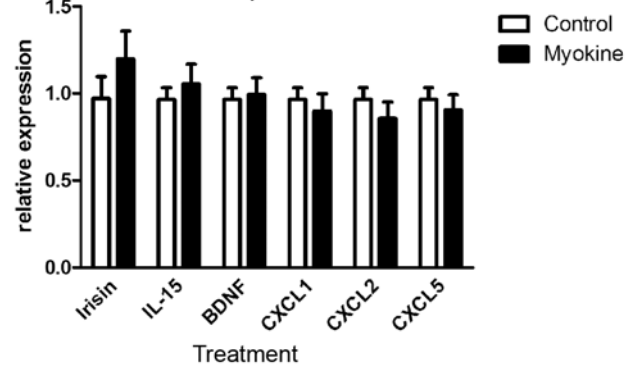

Figure S1

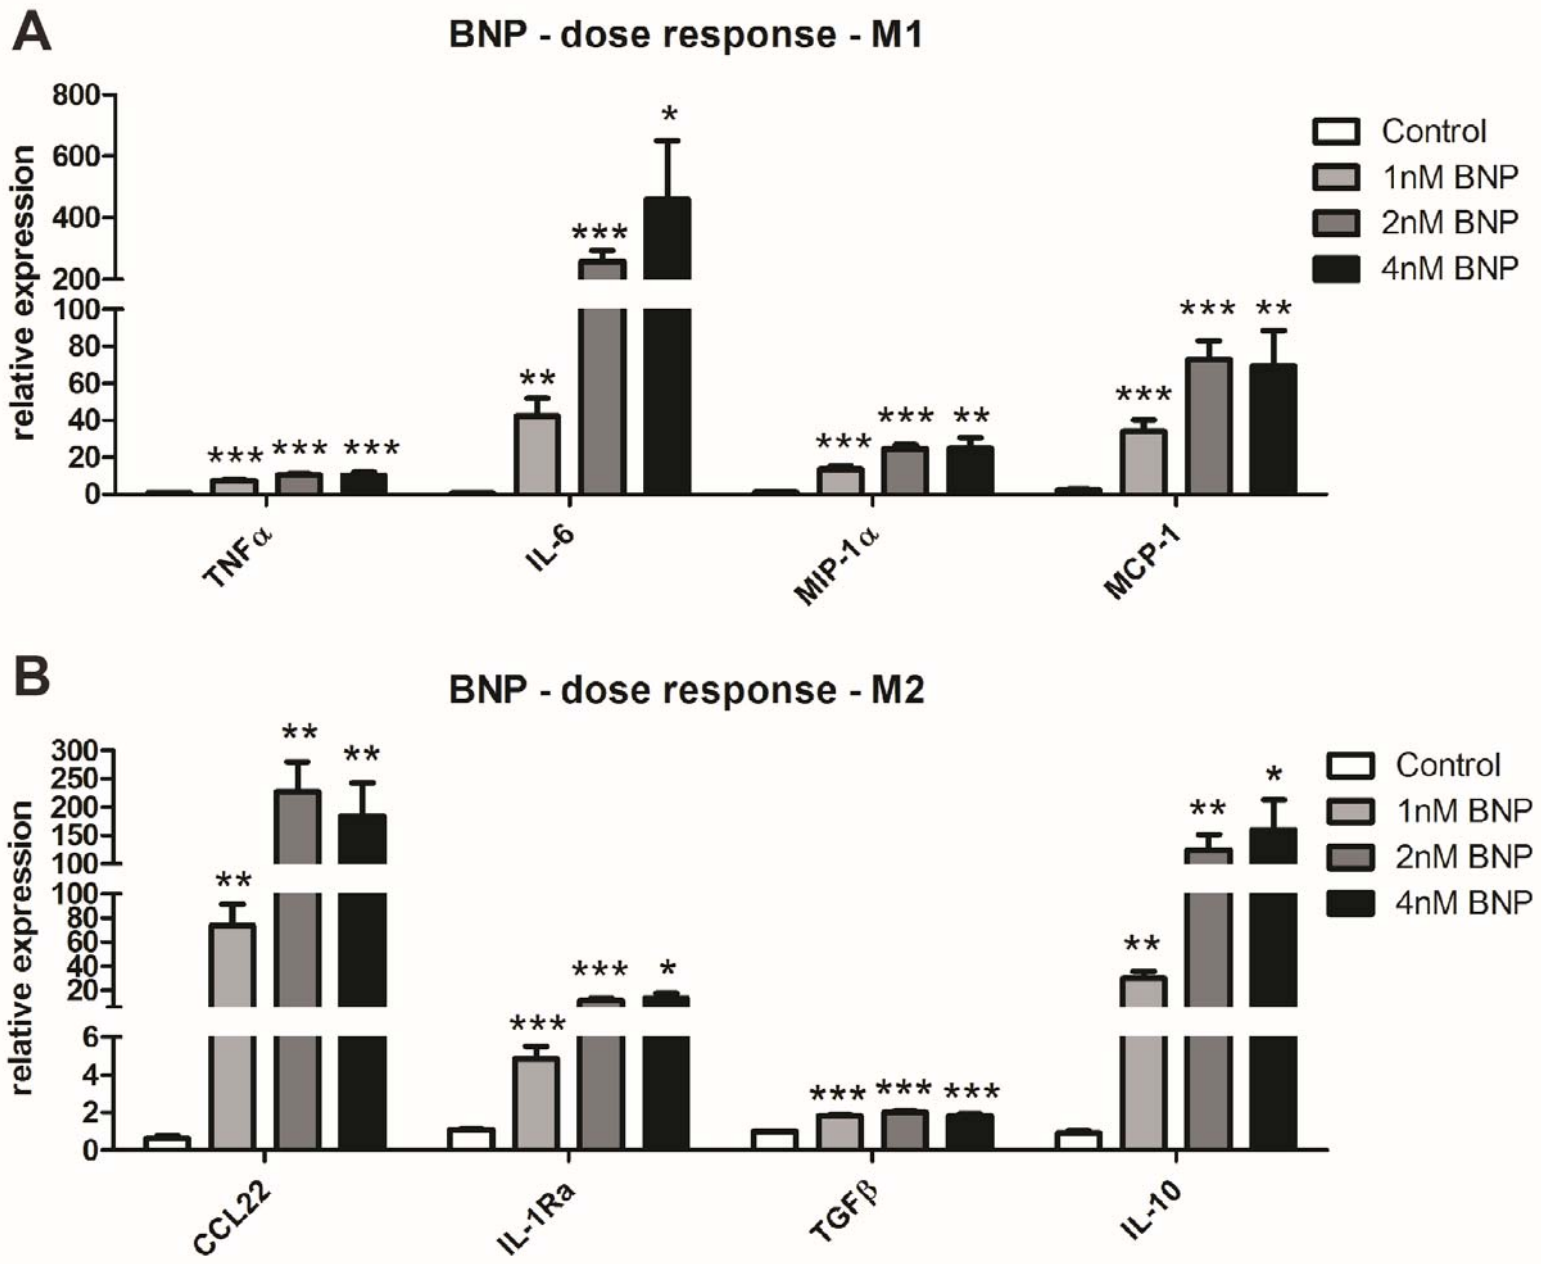

Figure S2

## Supplemental Tables

**Supplemental Table S1:** Primer sequences for RT-qPCR.

| Gene                            | Forward primer             | Reverse primer             |
|---------------------------------|----------------------------|----------------------------|
| <b>BDNF</b>                     | CGGCGCCCATGAAAAGAAGTA      | AGACCTCTCGAACCTGCCCT       |
| <b>BNP</b>                      | GGCCTCACAAAAGAACACCC       | TGCCCAAAGCAGCTTGAGAT       |
| <b>CCL7</b>                     | GCTGCTTTCAGCATCCAAGTG      | CCAGGGACACCGACTACTG        |
| <b>CCL22</b>                    | TGGAGTAGCTTCTTCACCCA       | TCTGGACCTCAAATCCTGC        |
| <b>CXCL1</b>                    | TGAGCTGCGCTGTCAGTGCCT      | AGAAGCCAGCGTTCACCAGA       |
| <b>CXCL2</b>                    | GAGCTTGAGTGTGACGCCCCAGG    | GTTAGCCTTGCCTTTGTTTCAGTATC |
| <b>CXCL5</b>                    | GCATTTCTGTTGCTGTTTCACGCTG  | CCTCCTTCTGGTTTTTTCAGTTTAGC |
| <b>CXCL10</b>                   | TCTGAGTGGGACTCAAGGGA       | AGGCTCGCAGGGATGATTTTC      |
| <b>IL-1Ra</b>                   | AAATCTGCTGGGGACCCTAC       | TGAGCTGGTTGTTTCTCAGG       |
| <b>IL-6</b>                     | CCACGGCCTTCCCTACTTC        | TTGGGAGTGGTATCCTCTGTGA     |
| <b>IL-10</b>                    | CTGGACAACATACTGCTAACCG     | GGGCATCACTTCTACCAGGTAA     |
| <b>IL-12</b>                    | GCTTCTCCACAGGAGGTTT        | CTAGACAAGGGCATGCTGGT       |
| <b>IL-15</b>                    | GAGGCCAAGAAGAGTTCTGGAT     | TGCCCAGGTAAGAGCTTCAA       |
| <b>Irisin</b>                   | ATGAAGGAGATGGGGAGGAA       | GCGGCAGAAGAGAGCTATAACA     |
| <b>LCN2</b>                     | TCTGATCCAGTAGCGACAGC       | CAGAAGGCAGCTTTACGATG       |
| <b>MCP-1</b>                    | CCCAATGAGTAGGCTGGAGA       | TCTGGACCCATTCTTCTTG        |
| <b>MIP-1<math>\alpha</math></b> | TCCCAGCCAGGTGTCATTTT       | TTGGAGTCAGCGCAGATCTG       |
| <b>Pcolce</b>                   | GCTCCATATCGAAGACTCGG       | GTTACGTGGCAAGTGAGGGT       |
| <b>PGC-1<math>\alpha</math></b> | TGATGTGAATGACTTGGATACAGACA | GCTCATTGTTGTACTGGTTGGATATG |
| <b>TBP</b>                      | GGCCTCTCAGAAGCATCACTA      | GCCAAGCCCTGAGCATAA         |
| <b>TGF<math>\beta</math></b>    | CAACCCAGGTCCTTCCTAAA       | GGAGAGCCCTGGATACCAAC       |
| <b>TNF<math>\alpha</math></b>   | CACAAGATGCTGGGACAGTGA      | TCCTTGATGGTGGTGCATGA       |

## Supplemental Table S2: Complete proteomic analysis

See attached Excel file “Proteomics\_Supplemental\_Table\_S1.xlsx”
